# Supplementary material for: Subjective Mouthfeel and Temperature Alterations in COVID-19 Patients Six to Ten Months After Diagnosis
Source: PubMed Central journal article supplement (PMC9660145; doi:10.1007/s12078-022-09304-y), 2022-11-12
Supplement: 12078_2022_9304_MOESM1_ESM.pdf [file 12078_2022_9304_MOESM1_ESM.pdf]

## **Supplementary material**

Title: Subjective mouthfeel and temperature alterations in COVID-19 patients six to ten months after diagnosis

Chemosensory Perception

Authors: Jip M. van Elst, Sanne Boesveldt, Arjan Vissink, Harriët Jager-Wittenaar, Anna K.L.

Reyners: Jacco J. de Haan \*

\*Corresponding author:

Affiliation: University of Groningen, University Medical Center Groningen, Department of Medical Oncology, Groningen, the Netherlands

E-mail: [j.j.de.haan@umcg.nl](mailto:j.j.de.haan@umcg.nl)

**A. Questionnaire on sensory changes**

**Informed consent**

Thank you for your interest in this study.   
 Did you read the information above about this study and do you agree with this?

**Patient characteristics**

Q1a. What is your age?

---

**< 18? RESPONDENT IS FINISHED**

Q1b. What is your gender?

**CIRCLE ONE CODE ONLY**

|  |        |   |
|--|--------|---|
|  | Male   | 1 |
|  | Female | 2 |
|  | Other  | 3 |

Q1c. In which month have you been positively tested for the Coronavirus?

**CIRCLE ONE CODE ONLY**

|  |                                     |   |                               |
|--|-------------------------------------|---|-------------------------------|
|  | February 2020                       | 1 | <b>CONTINUE TO Q1d</b>        |
|  | March 2020                          | 2 |                               |
|  | April 2020                          | 3 |                               |
|  | May 2020                            | 4 |                               |
|  | June 2020                           | 5 |                               |
|  | July 2020                           | 6 |                               |
|  | Later than July 2020                | 7 | <b>RESPONDENT IS FINISHED</b> |
|  | I don't have a positive corona test | 8 |                               |

|                                      |                                                                      |   |                            |
|--------------------------------------|----------------------------------------------------------------------|---|----------------------------|
| Q1d.                                 | Have you been admitted in the hospital due to your corona infection? |   |                            |
| <b>OMCIRKEL SLECHTS ÉÉN ANTWOORD</b> |                                                                      |   |                            |
|                                      | Yes, on the Intensive Care                                           | 1 | <b>CONTINUE<br/>TO Q1e</b> |
|                                      | Yes, on the nursing department                                       | 2 |                            |
|                                      | No                                                                   | 3 | <b>SKIP TO Q1f</b>         |

|                      |                                                                                    |
|----------------------|------------------------------------------------------------------------------------|
| Q1e.                 | How many days have you been admitted in the hospital due to your corona infection? |
| <b>OPEN QUESTION</b> |                                                                                    |
|                      |                                                                                    |

|                      |                                                                       |
|----------------------|-----------------------------------------------------------------------|
| Q1g.                 | Do you have other diseases for which you are treated with medication? |
| <b>OPEN QUESTION</b> |                                                                       |
|                      |                                                                       |

**Taste, smell, texture and temperature changes**

|      |                                                                                                                                    |   |                        |
|------|------------------------------------------------------------------------------------------------------------------------------------|---|------------------------|
| Q2a. | How has your <b>sense of smell</b> changed compared to before being positively tested for the corona virus, even if just a little? |   |                        |
|      | <b>CIRCLE ONE CODE ONLY</b>                                                                                                        |   |                        |
|      | I do not perceive any smell at all                                                                                                 | 1 | <b>CONTINUE TO Q2b</b> |
|      | I perceive a difference in intensity of smells in general/lack of smell ( smell acuity )                                           | 2 |                        |
|      | I don't perceive food smells in the same way I did before (smell alteration)                                                       | 3 |                        |
|      | I detect new bad smells                                                                                                            | 4 |                        |
|      | I did have changes in smell, but not anymore                                                                                       | 5 | <b>SKIP TO Q3a</b>     |
|      | I do not perceive any <u>change</u> in smell perception                                                                            | 6 |                        |

|       |                                                                                                                   |          |             |           |
|-------|-------------------------------------------------------------------------------------------------------------------|----------|-------------|-----------|
| Q2b.  | <b>ONLY ASK THOSE WHO SELECTED 1-4 IN Q2a</b>                                                                     |          |             |           |
|       | Thinking about the things that have changed your <b>sense of smell</b> , how much does it impact your daily life? |          |             |           |
|       | <b>CIRCLE ONE CODE ONLY</b>                                                                                       |          |             |           |
|       | Not at all                                                                                                        | A little | Quite a bit | Very much |
| Smell | 1                                                                                                                 | 2        | 3           | 4         |

|       |                                                                                                                                                         |          |             |           |
|-------|---------------------------------------------------------------------------------------------------------------------------------------------------------|----------|-------------|-----------|
| Q2c.  | Thinking about the things that have changed your <b>sense of smell</b> , is your quality of life negatively affected because of these changes in taste? |          |             |           |
|       | <b>CIRCLE ONE CODE ONLY</b>                                                                                                                             |          |             |           |
|       | Not at all                                                                                                                                              | A little | Quite a bit | Very much |
| Smell | 1                                                                                                                                                       | 2        | 3           | 4         |

|                              |                                                                                                                                    |   |                        |
|------------------------------|------------------------------------------------------------------------------------------------------------------------------------|---|------------------------|
| Q3a.                         | How has your <b>sense of taste</b> changed compared to before being positively tested for the corona virus, even if just a little? |   |                        |
| <b>CIRCLE ALL THAT APPLY</b> |                                                                                                                                    |   |                        |
|                              | I do not perceive any taste anymore                                                                                                | 1 | <b>CONTINUE TO Q3b</b> |
|                              | I perceive a difference in intensity of tastes in general (lack of taste)                                                          | 2 |                        |
|                              | I don't perceive certain tastes the same way I did before (taste alteration)                                                       | 3 |                        |
|                              | I detect new bad tastes in my mouth                                                                                                | 4 | <b>SKIP TO Q4a</b>     |
|                              | I did have changes in taste, but not anymore                                                                                       | 5 |                        |
|                              | I do not perceive any <u>change</u> in taste perception                                                                            | 6 |                        |

|                             |                                                                                                                                                                   |            |          |             |           |
|-----------------------------|-------------------------------------------------------------------------------------------------------------------------------------------------------------------|------------|----------|-------------|-----------|
| Q3b.                        | <b>ONLY ASK THOSE WHO SELECTED 1-4 IN Q3a</b>                                                                                                                     |            |          |             |           |
|                             | Thinking about the things that have changed your <b>sense of taste</b> (e.g. sweet, salt, sour, bitter, metallic taste), how much does it impact your daily life? |            |          |             |           |
| <b>CIRCLE ONE CODE ONLY</b> |                                                                                                                                                                   |            |          |             |           |
|                             |                                                                                                                                                                   | Not at all | A little | Quite a bit | Very much |
|                             | Taste                                                                                                                                                             | 1          | 2        | 3           | 4         |

|      |                                                                                                                                                                                                         |            |          |             |           |
|------|---------------------------------------------------------------------------------------------------------------------------------------------------------------------------------------------------------|------------|----------|-------------|-----------|
| Q3c. | Thinking about the things that have changed your <b>sense of taste</b> (e.g. sweet, salt, sour, bitter, metallic taste), is your quality of life negatively affected because of these changes in taste? |            |          |             |           |
|      | <b>CIRCLE ONE CODE ONLY</b>                                                                                                                                                                             |            |          |             |           |
|      |                                                                                                                                                                                                         | Not at all | A little | Quite a bit | Very much |
|      | Taste                                                                                                                                                                                                   | 1          | 2        | 3           | 4         |

|                              |                                                                                                                                          |   |                        |
|------------------------------|------------------------------------------------------------------------------------------------------------------------------------------|---|------------------------|
| Q4a.                         | How has your <b>sense of mouthfeel</b> , changed compared to before being positively tested for the corona virus, even if just a little? |   |                        |
| <b>CIRCLE ALL THAT APPLY</b> |                                                                                                                                          |   |                        |
|                              | I perceive mouthfeel different than before                                                                                               | 1 | <b>CONTINUE TO Q4b</b> |
|                              | I do perceive a dry mouth                                                                                                                | 2 |                        |
|                              | I prefer other textures (e.g. thicker/thinner) than before                                                                               | 3 |                        |
|                              | I don't feel the tingling sensation of carbonated drinks anymore                                                                         | 4 | <b>SKIP TO Q5a</b>     |
|                              | I did have changes in mouthfeel, but not anymore                                                                                         | 5 |                        |
|                              | I do not perceive any <u>change</u> in mouthfeel perception                                                                              | 6 |                        |

|           |                                                                                                                                                                                                                                                            |            |          |             |
|-----------|------------------------------------------------------------------------------------------------------------------------------------------------------------------------------------------------------------------------------------------------------------|------------|----------|-------------|
| Q4b.      | <b>ONLY ASK THOSE WHO SELECTED 1-4 IN Q4a</b><br>Thinking about the things that have changed your <b>sense of mouthfeel</b> (e.g. dry mouth feelings, temperature perception), how much does it impact your daily life?<br><br><b>CIRCLE ONE CODE ONLY</b> |            |          |             |
|           |                                                                                                                                                                                                                                                            | Not at all | A little | Quite a bit |
| Mouthfeel | 1                                                                                                                                                                                                                                                          | 2          | 3        | 4           |

|           |                                                                                                                                                                                                                                                 |            |          |             |
|-----------|-------------------------------------------------------------------------------------------------------------------------------------------------------------------------------------------------------------------------------------------------|------------|----------|-------------|
| Q4c.      | Thinking about the things that have changed your <b>sense of mouthfeel</b> (e.g. dry mouth feelings, temperature perception), is your quality of life negatively affected because of these changes in taste?<br><br><b>CIRCLE ONE CODE ONLY</b> |            |          |             |
|           |                                                                                                                                                                                                                                                 | Not at all | A little | Quite a bit |
| Mouthfeel | 1                                                                                                                                                                                                                                               | 2          | 3        | 4           |

|                                                                  |                                                                                                                                                                                                                                         |   |                        |  |
|------------------------------------------------------------------|-----------------------------------------------------------------------------------------------------------------------------------------------------------------------------------------------------------------------------------------|---|------------------------|--|
| Q5a.                                                             | Do you have a change in preference on the <b>specific temperature at which food and drinks are served</b> , compared to before being positively tested for the corona virus, even if just a little?<br><br><b>CIRCLE ALL THAT APPLY</b> |   |                        |  |
|                                                                  | Yes, I prefer frozen now                                                                                                                                                                                                                | 1 | <b>CONTINUE TO Q5b</b> |  |
| Yes, I prefer chilled (fridge temperature) now                   | 2                                                                                                                                                                                                                                       |   |                        |  |
| Yes, I prefer ambient temperature now (around 20 degree Celsius) | 3                                                                                                                                                                                                                                       |   |                        |  |
| Yes, I prefer a little warmer now                                | 4                                                                                                                                                                                                                                       |   |                        |  |
| Yes, I prefer hot now                                            | 5                                                                                                                                                                                                                                       |   |                        |  |
| My preferences was changed, but not anymore                      | 6                                                                                                                                                                                                                                       |   |                        |  |
| No, it remains the same                                          | 7                                                                                                                                                                                                                                       |   |                        |  |

|             |                                                                                                                                                                                                                                                 |            |          |             |
|-------------|-------------------------------------------------------------------------------------------------------------------------------------------------------------------------------------------------------------------------------------------------|------------|----------|-------------|
| Q5b.        | <b>ONLY ASK THOSE WHO SELECTED 1-4 IN Q5a</b><br>Thinking about the things that have changed your <b>specific temperature at which food and drinks are served</b> , how much does it impact your daily life?<br><br><b>CIRCLE ONE CODE ONLY</b> |            |          |             |
|             |                                                                                                                                                                                                                                                 | Not at all | A little | Quite a bit |
| Temperature | 1                                                                                                                                                                                                                                               | 2          | 3        | 4           |

|             |                                                                                                                                                                                                                                      |          |             |           |
|-------------|--------------------------------------------------------------------------------------------------------------------------------------------------------------------------------------------------------------------------------------|----------|-------------|-----------|
| Q5c.        | Thinking about the things that have changed your <b>specific temperature at which food and drinks are served</b> , is your quality of life negatively affected because of these changes in taste?<br><br><b>CIRCLE ONE CODE ONLY</b> |          |             |           |
|             | Not at all                                                                                                                                                                                                                           | A little | Quite a bit | Very much |
| Temperature | 1                                                                                                                                                                                                                                    | 2        | 3           | 4         |

- **IF RESPONDENT HAS SELECTED CODES 1-4 AT Q2a, ASK QUESTION Q6a.**
- **IF RESPONDENT HAS SELECTED CODE 5 AT Q2a AND IF RESPONDENT HAS SELECTED CODES 1-4 AT Q3a, ASK QUESTION Q7a.**
- **IF RESPONDENT HAS SELECTED CODE 5 AT Q2a AND Q3a, THE QUESTIONNAIRE IS COMPLETED.**

## Smell

**RESEARCHER: ASK QUESTION Q6a IF RESPONDENT HAS SELECTED CODES 1-4 AT Q2a (SMELL PERCEPTIONS HAVE CHANGED).**

|          |                                                                                                                                                                                      |                        |             |           |
|----------|--------------------------------------------------------------------------------------------------------------------------------------------------------------------------------------|------------------------|-------------|-----------|
| Q6a.     | Thinking about your experiences of eating and drinking <b>since you have been tested positive for the corona virus</b> , to what level of severity did your smell perception change? |                        |             |           |
|          | <b>CIRCLE ONE CODE ONLY</b>                                                                                                                                                          |                        |             |           |
|          | Not at all                                                                                                                                                                           | A little               | Quite a bit | Very much |
| a. Smell | 1                                                                                                                                                                                    | 2                      | 3           | 4         |
|          |                                                                                                                                                                                      | <b>CONTINUE TO Q6b</b> |             |           |

|        |                                                                                                         |                          |        |                       |           |             |
|--------|---------------------------------------------------------------------------------------------------------|--------------------------|--------|-----------------------|-----------|-------------|
| Q6b.   | <b>ONLY ASK THOSE WHO SELECTED 2-4 IN Q6a</b>                                                           |                          |        |                       |           |             |
|        | How is the <b>course</b> of the smell changes since you have been tested positive for the corona virus? |                          |        |                       |           |             |
|        | <b>CIRCLE ONE CODE ONLY</b>                                                                             |                          |        |                       |           |             |
|        | It decreases /<br>I'm almost<br>back at my<br>old level.                                                | It decreases<br>a little | Stable | Increases a<br>little | Increases | Fluctuating |
| Course | 1                                                                                                       | 2                        | 3      | 4                     | 5         | 6           |

|      |                                                                                                   |   |
|------|---------------------------------------------------------------------------------------------------|---|
| Q6c. | Do you have continuous nasal congestion since you have been tested positive for the corona virus? |   |
|      | <b>CIRCLE ONE CODE ONLY</b>                                                                       |   |
|      | No                                                                                                | 1 |
|      | At the start, but not anymore                                                                     | 2 |
|      | Yes                                                                                               | 3 |



Q6d. Generally, what do you do to cope with bad or distorted smells?

**CIRCLE ALL THAT APPLY**

|                                                                                             |   |  |
|---------------------------------------------------------------------------------------------|---|--|
| I don't have bad or distorted smells                                                        | 1 |  |
| Nothing                                                                                     | 2 |  |
| I choose colder foods (sandwiches, salads, fruits, and cheeses) that are less aromatic      | 3 |  |
| I open the windows and use the exhaust fan when cooking; open containers away from the face | 4 |  |
| I eat other types of food that have smells I can bear                                       | 5 |  |
| Other, please specify: _____                                                                | 6 |  |

Q6e. Generally, what do you do to cope with diminished smell?

**CIRCLE ALL THAT APPLY**

|                                                                                      |   |  |
|--------------------------------------------------------------------------------------|---|--|
| I don't have a diminished smell                                                      | 1 |  |
| Nothing                                                                              | 2 |  |
| I check more often if the gas is turned off                                          | 3 |  |
| I smell at products to check if I do smell something                                 | 4 |  |
| I ask other people to smell at possible rotten foods                                 | 5 |  |
| I pay more attention on personal hygiene (putting on clean clothes, extra deodorant) | 6 |  |
| Other, please specify: _____                                                         | 7 |  |

Q6f. Can you please specify what, if any, odors you feel more sensitively than before?

**CIRCLE ALL THAT APPLY**

|                             | <b>Q12c</b> |  |
|-----------------------------|-------------|--|
| Cleaning products           | 1           |  |
| Perfume                     | 2           |  |
| Odor of the hospital room   | 3           |  |
| Fish                        | 4           |  |
| Dairy (milk)                | 5           |  |
| Meat                        | 6           |  |
| Acidic fruit                | 7           |  |
| Sweet fruits                | 8           |  |
| Savory                      | 9           |  |
| Food cooking                | 10          |  |
| Other, please specify:_____ | 11          |  |
| None                        | 12          |  |

- IF RESPONDENT HAS SELECTED CODES 1-4 AT Q3a, ASK QUESTION Q7a.

- IF RESPONDENT HAS SELECTED CODE 5 AT Q3a, ASK QUESTION Q14

**TASTE**

**RESEARCHER: ASK QUESTION Q7a IF RESPONDENT HAS SELECTED CODES 1-4 AT Q3a (TASTE PERCEPTIONS HAVE CHANGED).**

|                                                              |                                                                                                                                                                                                                         |          |                        |           |
|--------------------------------------------------------------|-------------------------------------------------------------------------------------------------------------------------------------------------------------------------------------------------------------------------|----------|------------------------|-----------|
| Q7a.                                                         | Thinking about your experiences of eating and drinking <b>since you have been tested positive for the corona virus</b> , to what level of severity did your taste perception change?<br><br><b>CIRCLE ONE CODE ONLY</b> |          |                        |           |
|                                                              | Not at all                                                                                                                                                                                                              | A little | Quite a bit            | Very much |
| a. Taste<br>(e.g. sweet, salty, sour, bitter, metallic etc.) | 1                                                                                                                                                                                                                       | 2        | 3                      | 4         |
|                                                              | <b>SKIP TO Q14</b>                                                                                                                                                                                                      |          | <b>CONTINUE TO Q7b</b> |           |

|        |                                                                                                                                                                                                  |                          |        |                       |           |                 |
|--------|--------------------------------------------------------------------------------------------------------------------------------------------------------------------------------------------------|--------------------------|--------|-----------------------|-----------|-----------------|
| Q7b.   | <b>ONLY ASK THOSE WHO SELECTED 2-4 IN Q7a.</b><br><br>How is the <b>course</b> of the taste changes since you have been tested positive for the corona virus?<br><br><b>CIRCLE ONE CODE ONLY</b> |                          |        |                       |           |                 |
|        | It decreases /<br>I'm almost back<br>at my old level.                                                                                                                                            | It decreases<br>a little | Stable | Increases a<br>little | Increases | Fluctuat<br>ing |
| Course | 1                                                                                                                                                                                                | 2                        | 3      | 4                     | 5         | 6               |

|      |                                                                                                                   |   |
|------|-------------------------------------------------------------------------------------------------------------------|---|
| Q7c. | Generally, what do you do to cope with the <b>change in taste intensity</b> ?<br><br><b>CIRCLE ALL THAT APPLY</b> |   |
|      | Nothing                                                                                                           | 1 |
|      | Experiment with stronger flavors such as spices and marinades                                                     | 2 |
|      | Avoid stronger flavors, like not adding spices or pepper                                                          | 3 |
|      | Choose soft foods such as baked chicken, potatoes, pasta and rice                                                 | 4 |
|      | Consume foods with high moisture or water content                                                                 | 5 |
|      | Add sauces or gravy to moisten foods                                                                              | 6 |
|      | Other, please specify:.....                                                                                       | 7 |

|                                                           |                                                                                                                                                                |                   |                    |                        |                                      |
|-----------------------------------------------------------|----------------------------------------------------------------------------------------------------------------------------------------------------------------|-------------------|--------------------|------------------------|--------------------------------------|
| Q8a.                                                      | We would now like to ask you a bit more specifically about certain defined tastes. To what extent has the following <b>taste changed in intensity</b> for you? |                   |                    |                        |                                      |
|                                                           | <b>CIRCLE ONE CODE ONLY</b>                                                                                                                                    |                   |                    |                        |                                      |
|                                                           | Much stronger                                                                                                                                                  | Slightly stronger | No change          | Slightly weaker        | Much weaker / cannot taste it at all |
| A change in things that normally would taste <b>salty</b> | 1                                                                                                                                                              | 2                 | 3                  | 4                      | 5                                    |
|                                                           | <b>CONTINUE TO Q8b</b>                                                                                                                                         |                   | <b>SKIP TO Q9a</b> | <b>CONTINUE TO Q8b</b> |                                      |

|                    |                                                              |                                 |             |           |
|--------------------|--------------------------------------------------------------|---------------------------------|-------------|-----------|
| Q8b.               | <b>ONLY ASK THOSE WHO SELECTED CODES 1, 2, 4 OR 5 at Q8a</b> |                                 |             |           |
|                    | How much does the <b>change in salty taste</b> impact you?   |                                 |             |           |
|                    | <b>CIRCLE ONE CODE ONLY</b>                                  |                                 |             |           |
|                    | Not at all                                                   | A little                        | Quite a bit | Very much |
| <b>Salty taste</b> | 1                                                            | 2                               | 3           | 4         |
|                    | <b>SKIP TO Q9a</b>                                           | <b>CONTINUE TO QUESTION Q8c</b> |             |           |

|      |                                                                        |   |
|------|------------------------------------------------------------------------|---|
|      | <b>ONLY ASK THOSE WHO SELECTED CODES 2-4 at Q8b</b>                    |   |
| Q8c. | What do you do to cope with this change in <b>salty taste</b> ?        |   |
|      | <b>CIRCLE ALL THAT APPLY</b>                                           |   |
|      | Nothing                                                                | 1 |
|      | I limit salty foods and foods with added salt                          | 2 |
|      | I do not add salt during the cooking process or after meal preparation | 3 |
|      | I add fish sauce or soy sauce to the food                              | 4 |
|      | I add additional salt to the food                                      | 5 |
|      | I add more chicken essence / chicken powder to the food                | 6 |
|      | Other, please specify: _____                                           | 7 |

|                                                            |                                                                      |                   |                     |                        |                                      |
|------------------------------------------------------------|----------------------------------------------------------------------|-------------------|---------------------|------------------------|--------------------------------------|
| Q9a.                                                       | To what extent has the following taste changed in intensity for you? |                   |                     |                        |                                      |
|                                                            | <b>CIRCLE ONE CODE ONLY</b>                                          |                   |                     |                        |                                      |
|                                                            | Much stronger                                                        | Slightly stronger | No change           | Slightly weaker        | Much weaker / cannot taste it at all |
| A change in things that normally would taste <b>bitter</b> | 1                                                                    | 2                 | 3                   | 4                      | 5                                    |
|                                                            | <b>CONTINUE TO Q9b</b>                                               |                   | <b>SKIP TO Q10a</b> | <b>CONTINUE TO Q9b</b> |                                      |

|                     |                                                              |                                 |             |           |
|---------------------|--------------------------------------------------------------|---------------------------------|-------------|-----------|
| Q9b.                | <b>ONLY ASK THOSE WHO SELECTED CODES 1, 2, 4 OR 5 at Q9a</b> |                                 |             |           |
|                     | How much does the <b>change in bitter taste</b> impact you?  |                                 |             |           |
|                     | <b>CIRCLE ONE CODE ONLY</b>                                  |                                 |             |           |
|                     | Not at all                                                   | A little                        | Quite a bit | Very much |
| <b>Bitter taste</b> | 1                                                            | 2                               | 3           | 4         |
|                     | <b>SKIP TO Q10a</b>                                          | <b>CONTINUE TO QUESTION Q9c</b> |             |           |

|      |                                                                        |   |  |
|------|------------------------------------------------------------------------|---|--|
| Q9c. | <b>ONLY ASK THOSE WHO SELECTED CODES 2-4 at Q9b</b>                    |   |  |
|      | <b>ASK AS OPEN QUESTION</b>                                            |   |  |
|      | What do you do to cope with this change in <b>bitter taste</b> ?       |   |  |
|      | <b>CIRCLE ALL THAT APPLY</b>                                           |   |  |
|      | Nothing                                                                | 1 |  |
|      | I eat room-temperature or cold foods                                   | 2 |  |
|      | I limit intake of bitter products                                      | 3 |  |
|      | I try to make my food more sour (adding lime, lemon, vinegar or other) | 4 |  |
|      | Other, please specify: _____                                           | 5 |  |

|                                                             |                                                                      |                   |                     |                         |                                      |
|-------------------------------------------------------------|----------------------------------------------------------------------|-------------------|---------------------|-------------------------|--------------------------------------|
| Q10a.                                                       | To what extent has the following taste changed in intensity for you? |                   |                     |                         |                                      |
|                                                             | <b>CIRCLE ONE CODE ONLY</b>                                          |                   |                     |                         |                                      |
|                                                             | Much stronger                                                        | Slightly stronger | No change           | Slightly weaker         | Much weaker / cannot taste it at all |
| A change in things that normally would taste <b>sweet</b> . | 1                                                                    | 2                 | 3                   | 4                       | 5                                    |
|                                                             | <b>CONTINUE TO Q10b</b>                                              |                   | <b>SKIP TO Q11a</b> | <b>CONTINUE TO Q10b</b> |                                      |

|                    |                                                               |                                  |             |           |
|--------------------|---------------------------------------------------------------|----------------------------------|-------------|-----------|
| Q10b.              | <b>ONLY ASK THOSE WHO SELECTED CODES 1, 2, 4 OR 5 at Q10a</b> |                                  |             |           |
|                    | How much does the <b>change in sweet taste</b> impact you?    |                                  |             |           |
|                    | <b>CIRCLE ONE CODE ONLY</b>                                   |                                  |             |           |
|                    | Not at all                                                    | A little                         | Quite a bit | Very much |
| <b>Sweet taste</b> | 1                                                             | 2                                | 3           | 4         |
|                    | <b>SKIP TO Q11a</b>                                           | <b>CONTINUE TO QUESTION Q10c</b> |             |           |

|                                                       |                                                                    |   |
|-------------------------------------------------------|--------------------------------------------------------------------|---|
| <b>ONLY ASK THOSE WHO SELECTED CODES 2-4 at Q10B.</b> |                                                                    |   |
| Q10c.                                                 | What do you do to cope with this change in sweet taste?            |   |
|                                                       | <b>CIRCLE ONE CODE ONLY</b>                                        |   |
|                                                       | Nothing                                                            | 1 |
|                                                       | I limit sweet foods and foods with added sugar                     | 2 |
|                                                       | I add salt to sweet food                                           | 3 |
|                                                       | I add more water to make the food less sweet                       | 4 |
|                                                       | I add sugar into the food                                          | 5 |
|                                                       | I add sweeteners into the food such as strawberries, vanilla, etc. | 6 |
|                                                       | Other, please specify: _____                                       | 7 |

|                                                            |                                                                      |                   |                     |                         |                                      |
|------------------------------------------------------------|----------------------------------------------------------------------|-------------------|---------------------|-------------------------|--------------------------------------|
| Q11a.                                                      | To what extent has the following taste changed in intensity for you? |                   |                     |                         |                                      |
|                                                            | <b>CIRCLE ONE CODE ONLY</b>                                          |                   |                     |                         |                                      |
|                                                            | Much stronger                                                        | Slightly stronger | No change           | Slightly weaker         | Much weaker / cannot taste it at all |
| A change in things that normally would taste <b>sour</b> . | 1                                                                    | 2                 | 3                   | 4                       | 5                                    |
|                                                            | <b>CONTINUE TO Q11b</b>                                              |                   | <b>SKIP TO Q12a</b> | <b>CONTINUE TO Q11b</b> |                                      |

|                   |                                                               |                                  |             |           |
|-------------------|---------------------------------------------------------------|----------------------------------|-------------|-----------|
| Q11b.             | <b>ONLY ASK THOSE WHO SELECTED CODES 1, 2, 4 OR 5 at Q11a</b> |                                  |             |           |
|                   | How much does the <b>change in sour taste</b> impact you?     |                                  |             |           |
|                   | <b>CIRCLE ONE CODE ONLY</b>                                   |                                  |             |           |
|                   | Not at all                                                    | A little                         | Quite a bit | Very much |
| <b>Sour taste</b> | 1                                                             | 2                                | 3           | 4         |
|                   | <b>SKIP TO Q12a</b>                                           | <b>CONTINUE TO QUESTION Q11c</b> |             |           |

|                                                       |                                                                |   |
|-------------------------------------------------------|----------------------------------------------------------------|---|
| <b>ONLY ASK THOSE WHO SELECTED 2-4 AT VRAAG Q11b.</b> |                                                                |   |
| Q11c.                                                 | What do you do to cope with this change in sour taste?         |   |
|                                                       | <b>CIRCLE ALL THAT APPLY</b>                                   |   |
|                                                       | Nothing                                                        | 1 |
|                                                       | I limit sour foods such as citrus fruits.                      | 2 |
|                                                       | I add sugar into the food to make it less sour.                | 3 |
|                                                       | I try to make the food more sour (adding lime, lemon, vinegar) | 4 |
|                                                       | Other, please specify: _____                                   | 5 |

|       |                                                                                                                                                                                        |                         |
|-------|----------------------------------------------------------------------------------------------------------------------------------------------------------------------------------------|-------------------------|
| Q12a. | Do you experience any <b>metallic tastes</b> (e.g. imagine if you bite a key / smell your finger after you hold a key for a while) compared to before infection with the corona virus? |                         |
|       | <b>CIRCLE ONE CODE ONLY</b>                                                                                                                                                            |                         |
|       | No                                                                                                                                                                                     | 1                       |
|       | Yes, I experience it without being presented with a food product                                                                                                                       | 2                       |
|       | Yes, I experience it only when being presented with a food product                                                                                                                     | 3                       |
|       |                                                                                                                                                                                        | <b>SKIP TO Q13a</b>     |
|       |                                                                                                                                                                                        | <b>CONTINUE TO Q12b</b> |

|                             |                                                                                                                          |                         |             |           |
|-----------------------------|--------------------------------------------------------------------------------------------------------------------------|-------------------------|-------------|-----------|
| Q12b.                       | <b>ONLY ASK THOSE WHO SELECTED 2-3 IN Q12a</b>                                                                           |                         |             |           |
|                             | Thinking about the things that make you experience any <b>metallic tastes</b> , how much does it impact your daily life? |                         |             |           |
| <b>CIRCLE ONE CODE ONLY</b> |                                                                                                                          |                         |             |           |
|                             | Not at all                                                                                                               | A little                | Quite a bit | Very much |
| Metallic tastes             | 1                                                                                                                        | 2                       | 3           | 4         |
|                             | <b>SKIP TO Q13a</b>                                                                                                      | <b>CONTINUE TO Q12c</b> |             |           |

|                                                                                             |                                                                        |   |  |
|---------------------------------------------------------------------------------------------|------------------------------------------------------------------------|---|--|
| Q12c.                                                                                       | <b>ONLY ASK THOSE WHO SELECTED CODES 2-4 at Q12b</b>                   |   |  |
|                                                                                             | What do you do to cope with this change in <b>metallic sensation</b> ? |   |  |
| <b>CIRCLE ALL THAT APPLY</b>                                                                |                                                                        |   |  |
|                                                                                             | Nothing                                                                | 1 |  |
| I limit red meat, liver, intestine, and other foods high in iron                            |                                                                        | 2 |  |
| I experiment with other high-protein food choices such as egg, poultry, fish, beans and soy |                                                                        | 3 |  |
| I use plastic utensils instead of metal                                                     |                                                                        | 4 |  |
| I avoid consuming foods from metal cans and/or avoid cooking in an iron skillet             |                                                                        | 5 |  |
| Other, please specify: _____                                                                |                                                                        | 6 |  |

|                  |                                                                                                                                                                                                  |                         |             |           |
|------------------|--------------------------------------------------------------------------------------------------------------------------------------------------------------------------------------------------|-------------------------|-------------|-----------|
| Q13a.            | Patients may experience a continuous taste in their mouth. Have you experienced a <b>continuous taste</b> in your mouth that you did not experience before your infection with the corona virus? |                         |             |           |
|                  | <b>CIRCLE ONE CODE ONLY</b>                                                                                                                                                                      |                         |             |           |
|                  | Not at all                                                                                                                                                                                       | A little                | Quite a bit | Very much |
| Continuous taste | 1                                                                                                                                                                                                | 2                       | 3           | 4         |
|                  |                                                                                                                                                                                                  | <b>CONTINUE TO Q13b</b> |             |           |



|                  |                                                                                                                           |          |             |           |
|------------------|---------------------------------------------------------------------------------------------------------------------------|----------|-------------|-----------|
| Q13b.            | <b>ONLY ASK THOSE WHO SELECTED 2-4 IN Q13a</b>                                                                            |          |             |           |
|                  | Thinking about the things that make you experience any <b>continuous taste</b> , how much does it impact your daily life? |          |             |           |
|                  | <b>CIRCLE ONE CODE ONLY</b>                                                                                               |          |             |           |
|                  | Not at all                                                                                                                | A little | Quite a bit | Very much |
| Continuous taste | 1                                                                                                                         | 2        | 3           | 4         |

|      |                                                                                                               |  |
|------|---------------------------------------------------------------------------------------------------------------|--|
| 13c. | Thinking about the things that make you experience any <b>continuous tastes</b> , which resembles this taste? |  |
|      | <b>CIRCLE ALL THAT APPLY</b>                                                                                  |  |
|      |                                                                                                               |  |
| 1    | Blood                                                                                                         |  |
| 2    | Bitter                                                                                                        |  |
| 3    | Something chemical                                                                                            |  |
| 4    | Something musty                                                                                               |  |
| 5    | Drugs                                                                                                         |  |
| 6    | Metallic                                                                                                      |  |
| 7    | Sweet                                                                                                         |  |
| 8    | Salty                                                                                                         |  |
| 9    | Sour                                                                                                          |  |
| 10   | Other, please specify _____                                                                                   |  |

|                                  |                                                                                                                 |   |
|----------------------------------|-----------------------------------------------------------------------------------------------------------------|---|
| Q14.                             | <b>ONLY ASK THOSE WHO SELECTED 1-4 IN Q2a and/or Q3a</b>                                                        |   |
|                                  | Would you like more guidance for your changes in smell of taste? If yes, what kind of guidance?                 |   |
|                                  | <b>CIRCLE ALL THAT APPLY</b>                                                                                    |   |
|                                  | No                                                                                                              | 1 |
|                                  | I would like a medicament (experimental) treatment                                                              | 2 |
|                                  | I would like to receive more information about smell and taste changes                                          | 3 |
|                                  | I would like to receive help from a dietitian to advise me on adapting my food to my changes in smell and taste | 4 |
|                                  | I would like to have my family receiving more information about my smell and taste changes                      | 5 |
| I would like (more) peer support | 6                                                                                                               |   |
| Other, please specify: _____     | 7                                                                                                               |   |
